# Supplementary material for: Robust multifunctional fluorine-free superhydrophobic fabrics for high-efficiency oil–water separation with ultrahigh flux
Source: Royal Society of Chemistry journal article supplement (doi:10.1039/d2nr00337f), 2022-01-01
Supplement: d2nr00337f2.pdf [file d2nr00337f2.pdf]

## Supporting Information

### **Robust multifunctional fluorine-free superhydrophobic fabrics for high-efficiency oil-water separation with ultrahigh flux**

Zheng Xiong<sup>a</sup>, Jian Huang<sup>\*a</sup>, Yongzhong Wu<sup>b</sup>, Xiao Gong<sup>\*a</sup>

a. State Key Laboratory of Silicate Materials for Architectures, Wuhan University of Technology, Wuhan 430070, P. R. China.

b. School of Mechanical Engineering, Suzhou University of Science and Technology, Suzhou 215009, China.

\* Corresponding authors:

**E-mail address:** [JHuang@whut.edu.cn](mailto:JHuang@whut.edu.cn) (J. Huang); [xgong@whut.edu.cn](mailto:xgong@whut.edu.cn) (X. Gong)

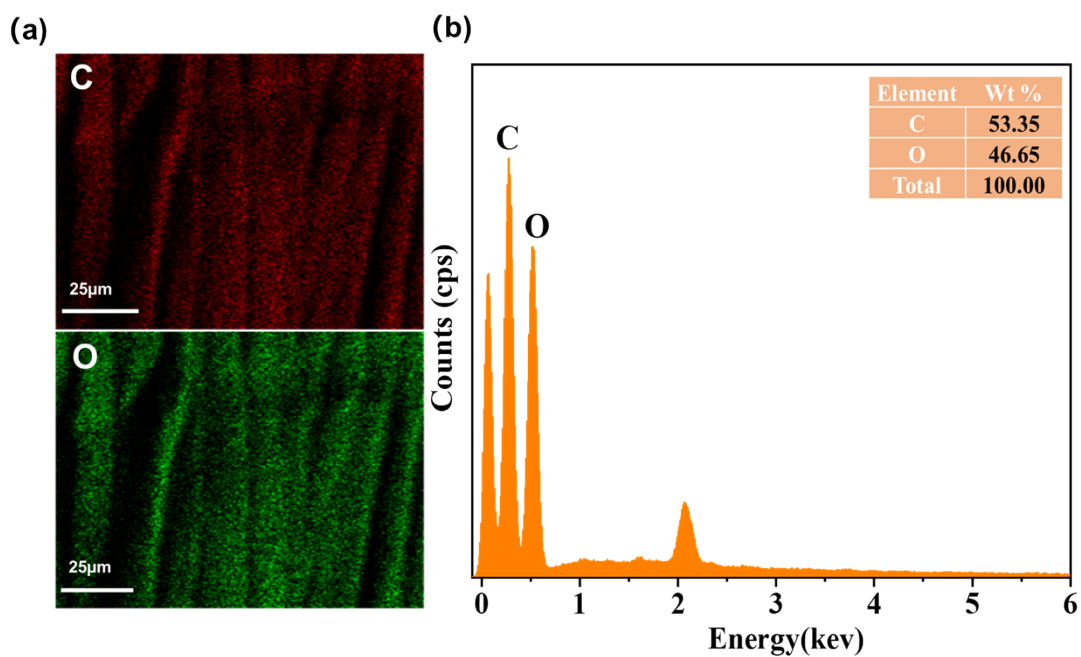

Figure S1. EDS element mapping images (a) and curve of pristine cotton fabric (b).

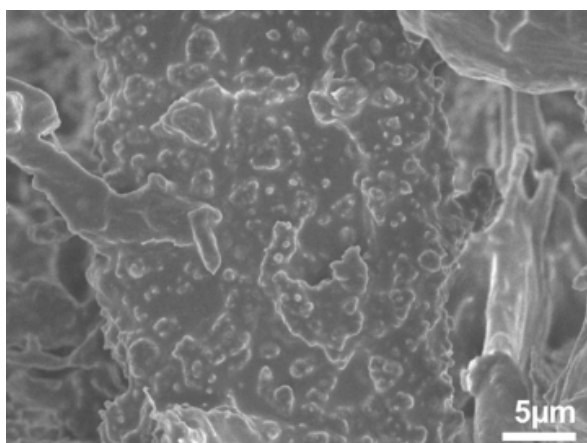

Figure S2. SEM image of the SiO<sub>2</sub>-TiO<sub>2</sub>/PDMS-coated fabric after the abrasion test of 30 cycles with the 800 mesh sandpaper.

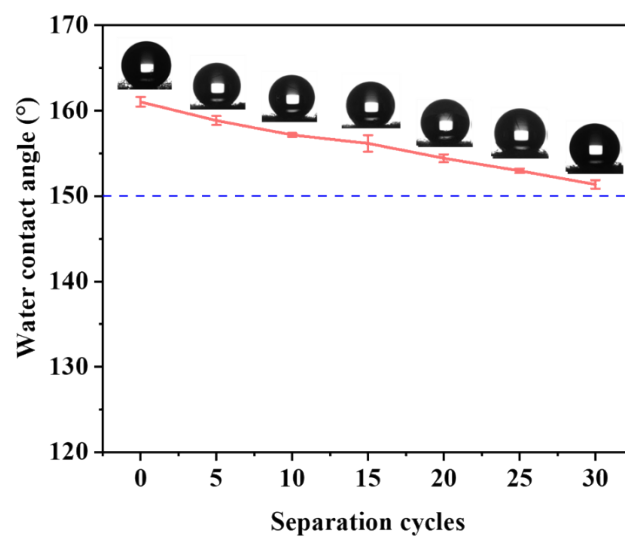

Figure S3. Water contact angle variations of the SiO<sub>2</sub>-TiO<sub>2</sub>/PDMS-coated superhydrophobic cotton fabric in different dichloromethane–water separation cycles.

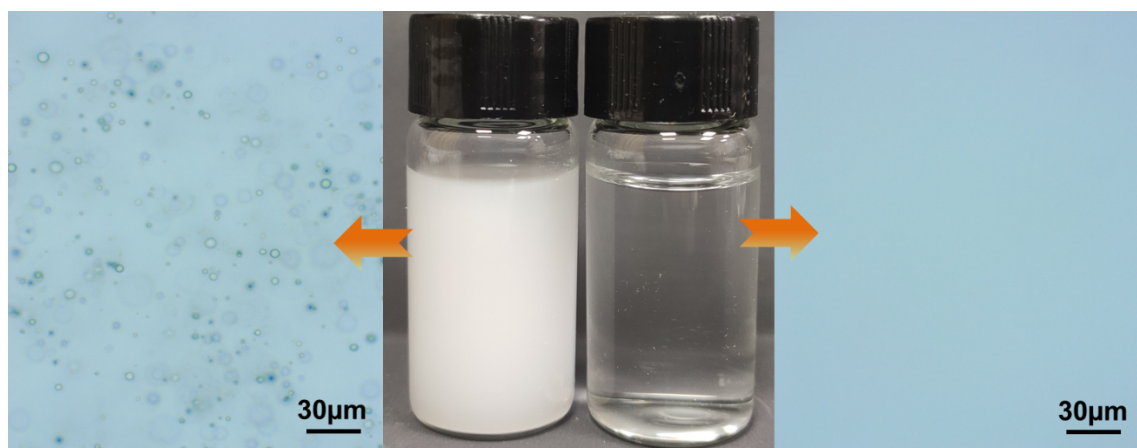

Figure S4. Optical microscopic images and digital images toluene-water before and after separation of the emulsion.

Video S1. Oil-water separation.
